# Supplementary material for: Label-Free Microfluidic Impedance Cytometry for Acrosome Integrity Assessment of Boar Spermatozoa
Source: MDPI journal article supplement (doi:10.3390/bios12090679), 2022-08-25
Supplement: s1 [file s1]

## Supplementary information

# Label-free microfluidic impedance cytometry for acrosome integrity assessment of boar spermatozoa

Stella A. Kruit<sup>a,\*</sup>, Douwe S. de Bruijn<sup>a</sup>, Marleen L.W.J. Broekhuijsen<sup>b,c</sup>, Wouter Olthuis<sup>a</sup>, Loes I. Segerink<sup>a</sup>

<sup>a</sup> BIOS Lab on a Chip Group, MESA+ & TechMed Institutes, Max Planck Center for Complex Fluid Dynamics, University of Twente, 7500 AE Enschede, The Netherlands

<sup>b</sup> CRV Holding BV, 6843 NW Arnhem, The Netherlands

<sup>c</sup> Topigs Norsvin Research Center BV, 6641 SZ Beuningen, The Netherlands

\* Correspondence: s.a.kruit@utwente.nl (S.A.K.)

### Supplementary figures

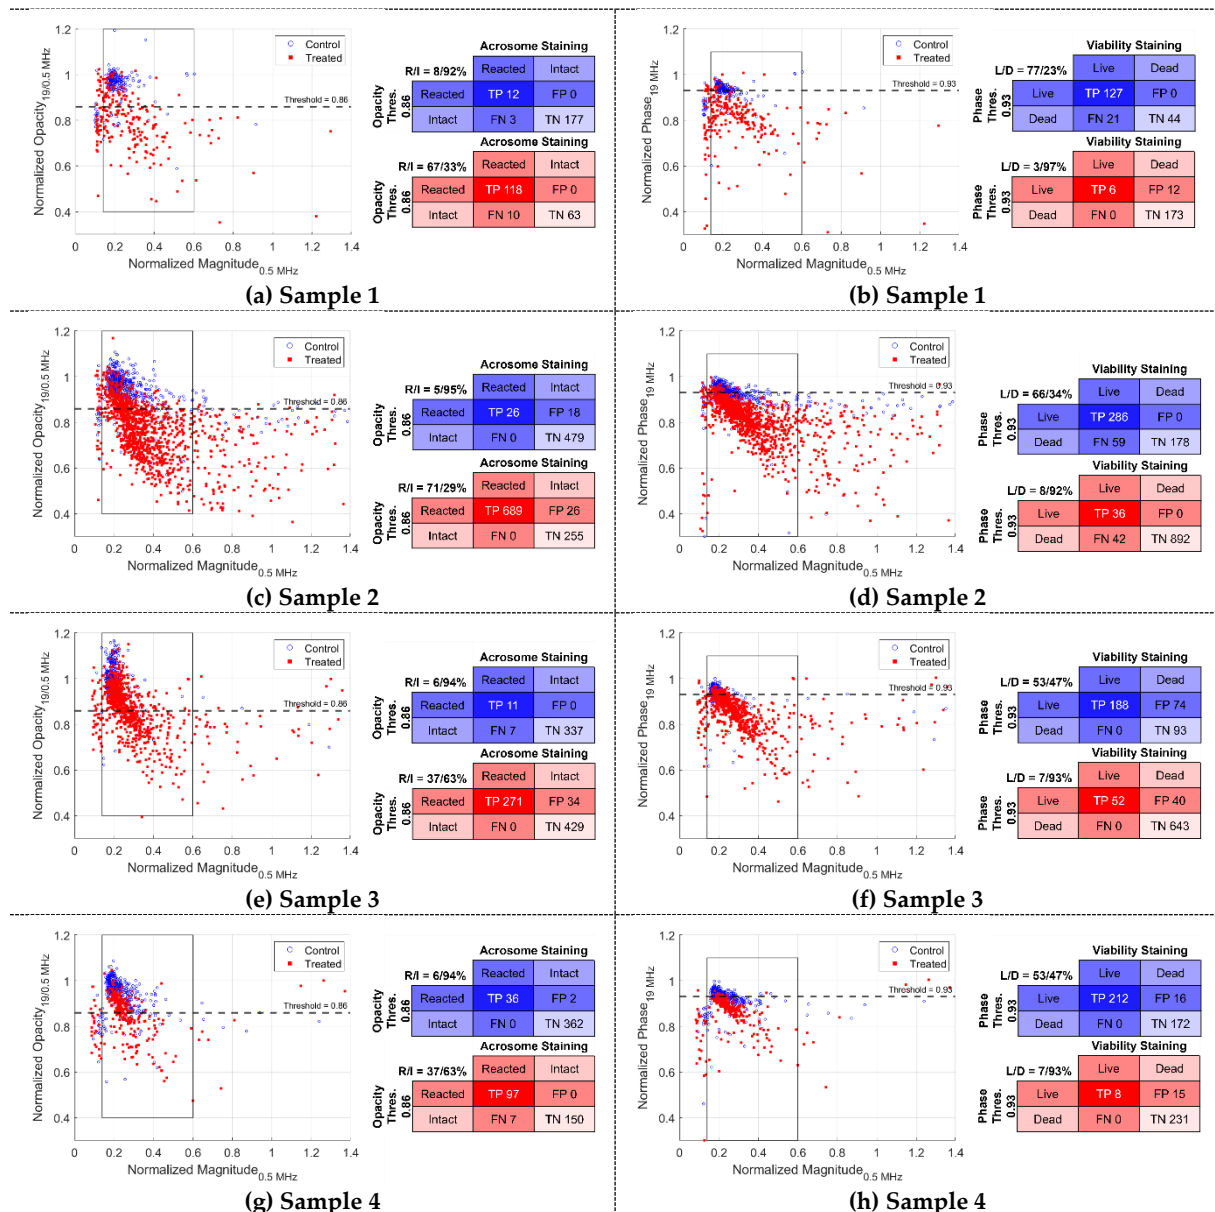

**Figure S1:** Scatterplots of normalized magnitude (0.5 MHz) vs. opacity (19/0.5 MHz) and normalized magnitude (0.5 MHz) vs. Phase (19 MHz) with their corresponding confusion matrix at a threshold of 0.86 and 0.93, respectively. The black square indicates the window of interest. a-b) sample 1. c-d) sample 2. e-f) sample 3. g-h) sample 4.

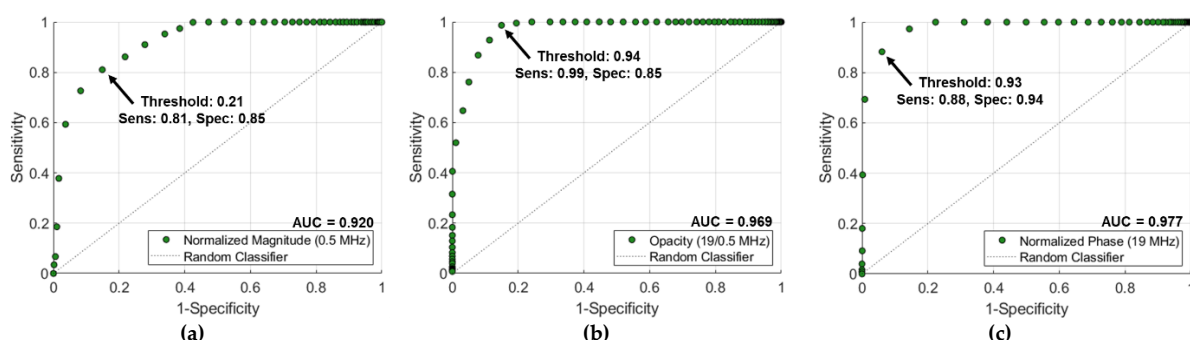

**Figure S2:** ROC curves to determine the sensitivity and specificity towards viability for (a) normalized magnitude (0.5 MHz), (b) phase (19 MHz) and (c) opacity (19/0.5 MHz). Phase at 19 MHz is found to be the most sensitive and specific for measuring viability.

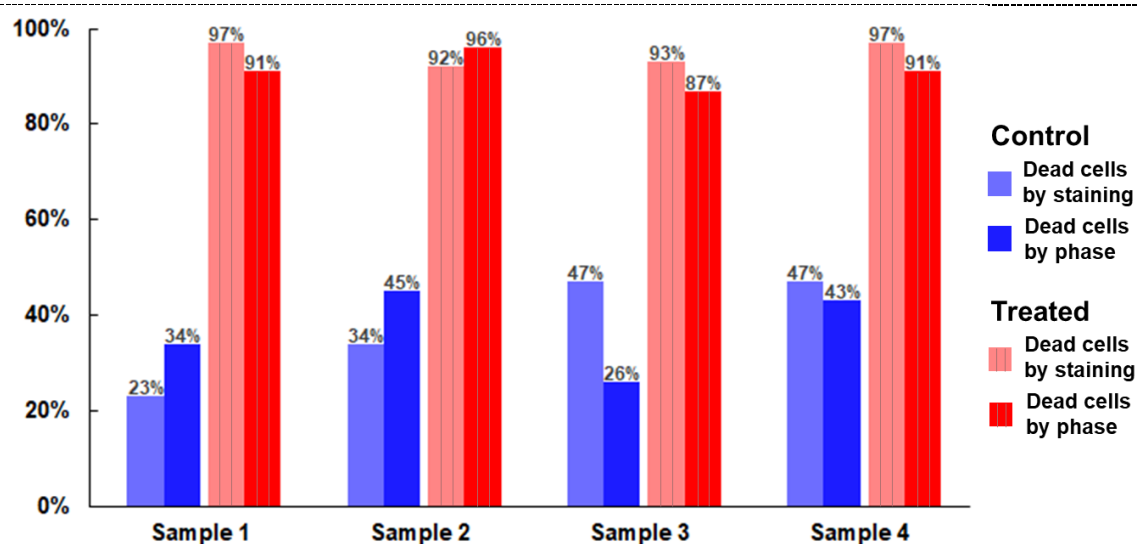

**Figure S3:** Determined viability by impedance phase at 19 MHz versus viability (PI positive) staining. A threshold of 0.93 is given as the compromise between sensitivity (88%) and specificity (94%) to give the best result for all control and treated samples.

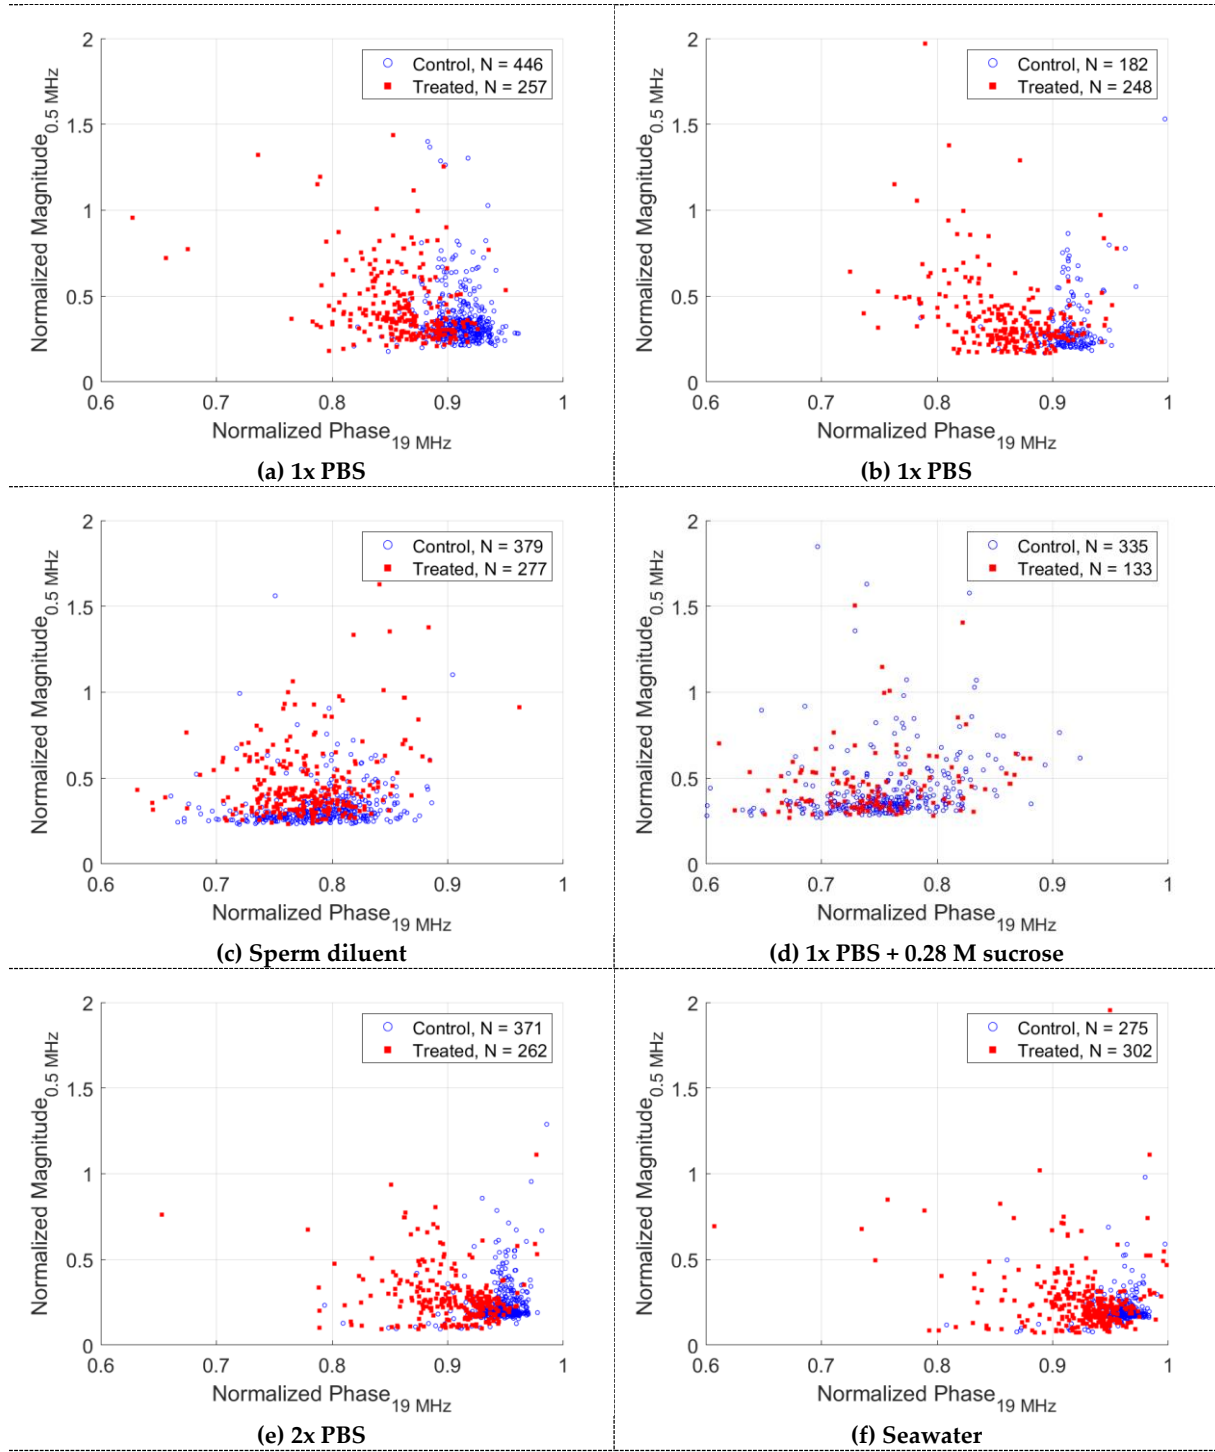

**Figure S4:** Scatterplots of normalized phase (19 MHz) vs. normalized magnitude (0.5 MHz) in buffers of varied conductivity and analyte composition. Impedance measured of control and treated sample in a-b) 1x PBS, c) sperm diluent ( $\sigma = 0.6$  S/m), d) 1x PBS + 0.28 M sucrose ( $\sigma < 0.6$  S/m), e) 2x PBS ( $1.6 < \sigma < 4$  S/m), and f) seawater ( $\sigma = 4$  S/m).
